# Supplementary material for: Engineering lignin-derivable diacrylate networks with tunable architecture and mechanics
Source: Royal Society of Chemistry journal article supplement (doi:10.1039/d4ma00159a), 2024-01-01
Supplement: d4ma00159a1.pdf [file d4ma00159a1.pdf]

# **Supporting Information (SI)**

## **Engineering lignin-derivable diacrylate networks with tunable architecture and mechanics**

*Yu-Tai Wong<sup>1</sup>, LaShanda T. J. Korley<sup>1,2\*</sup>*

<sup>1</sup>Department of Chemical and Biomolecular Engineering, University of Delaware, Newark, Delaware 19716, United States

<sup>2</sup>Department of Materials Science and Engineering, University of Delaware, Newark, Delaware 19716, United States

\*Corresponding author, E-mail: lkorley@udel.edu

## Abbreviations

|                 |                                       |
|-----------------|---------------------------------------|
| BGF             | Bisguaiacol F                         |
| BGFDA           | Bisguaiacol F diacrylate              |
| BA              | <i>n</i> -butyl acrylate              |
| DCM             | Dichloromethane                       |
| $E_t$           | Young's modulus                       |
| $T_{d,5\%}$     | Degradation temperature at 5 wt% loss |
| $T_g$           | Glass transition temperature          |
| VDA             | Vanillyl alcohol diacrylate           |
| $\varepsilon_B$ | Elongation-at-break                   |
| $\sigma_M$      | Ultimate tensile strength             |

**Proton ( $^1\text{H}$ ) Nuclear Magnetic Resonance (NMR) spectra for lignin-derivable building blocks in deuterated chloroform ( $\text{CDCl}_3$ )**

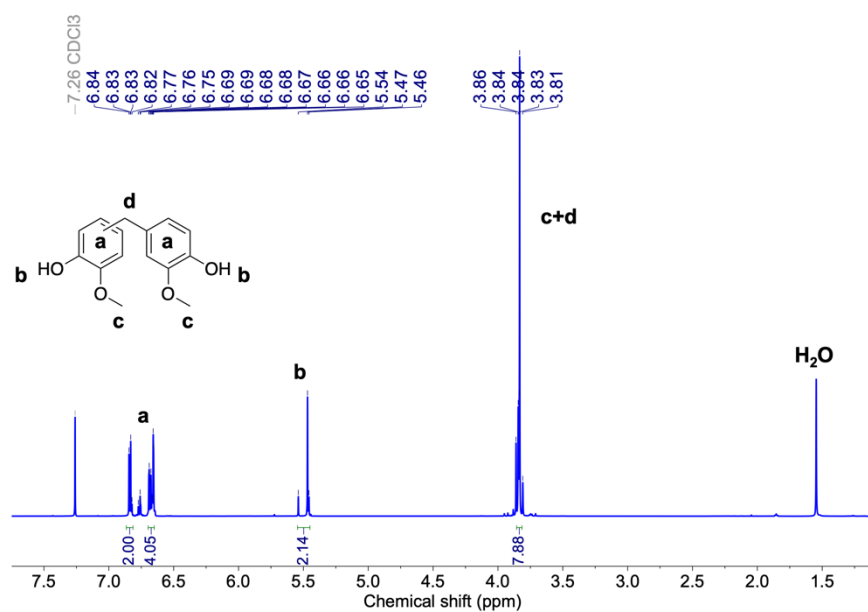

**Fig. S1**  $^1\text{H}$  NMR spectrum of bisguaiacol F

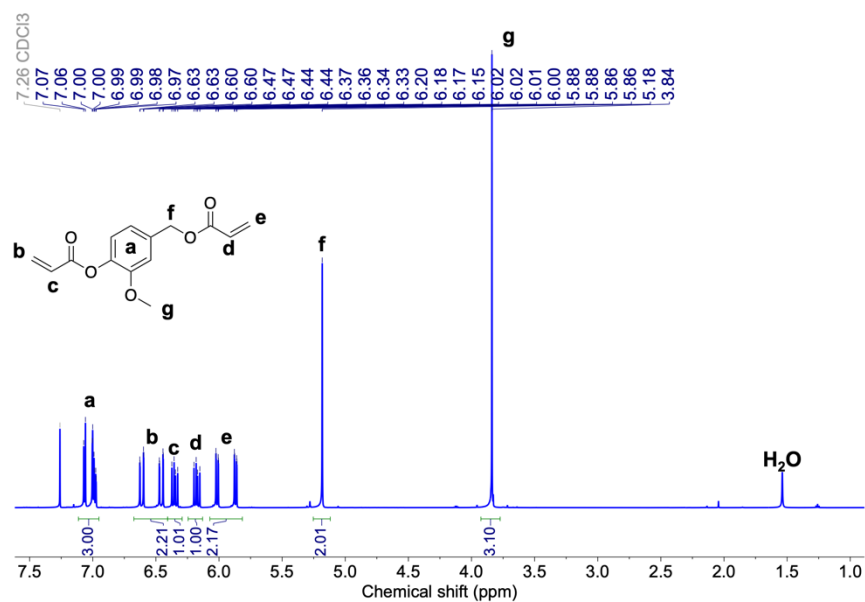

**Fig. S2**  $^1\text{H}$  NMR spectrum of vanillyl alcohol diacrylate

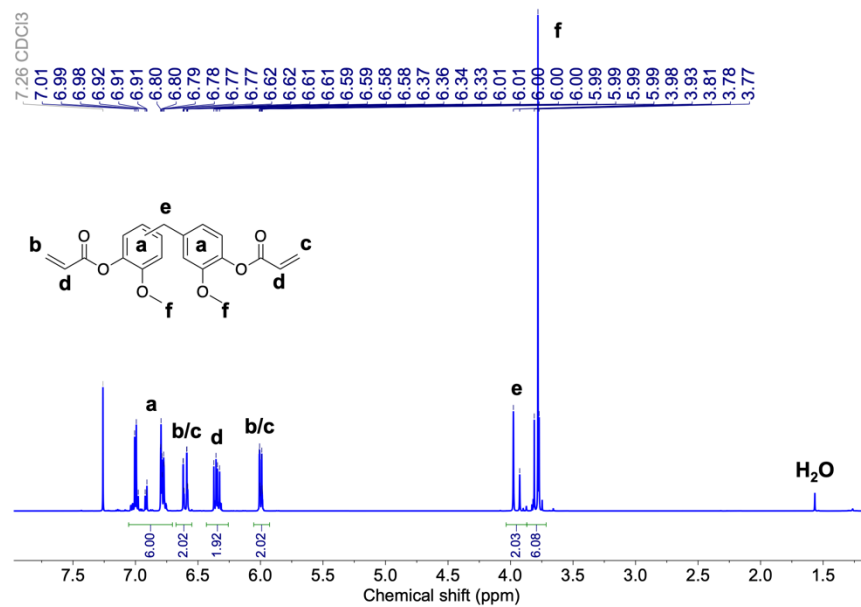

**Fig. S3** <sup>1</sup>H NMR spectrum of bisguaiacol F diacrylate

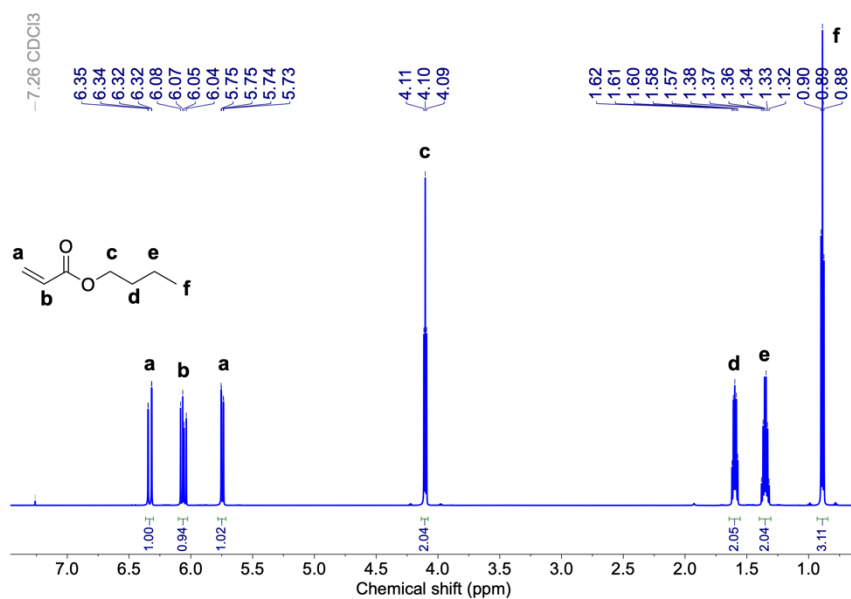

**Fig. S4** <sup>1</sup>H NMR spectrum of *n*-butyl acrylate

## Film curing steps and film appearances

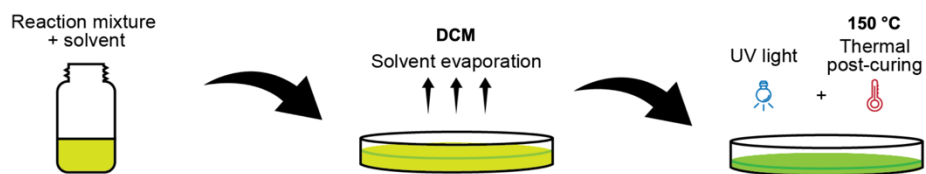

**Fig. S5** Schematic representation of film casting and curing procedures

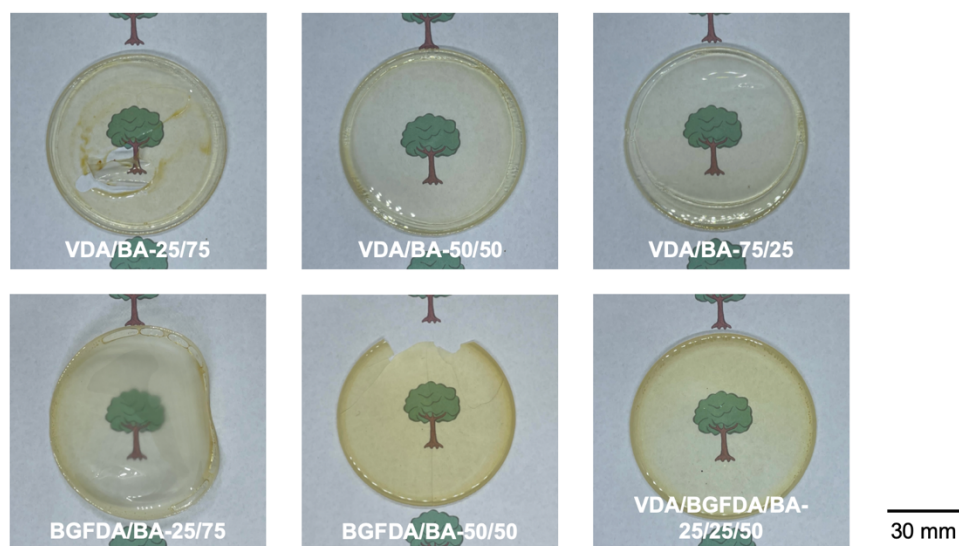

**Fig. S6** Optical images of each acrylate networks after thermal post-curing with a film thickness  $\sim 0.2$  mm

## Differential scanning calorimetry (DSC) results for curing of acrylate networks

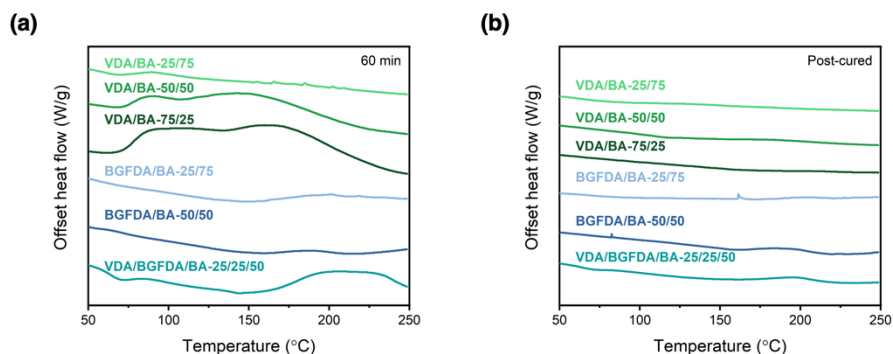

**Fig. S7** DSC curve of acrylate networks (a) before and (b) after thermal post-curing (exotherm up, 10 °C/min, N<sub>2</sub>). Exothermic peaks in (a) were applied to determine the temperature for thermal post-curing.

## Attenuated total reflectance-Fourier transform infrared (ATR-FTIR) spectra for acrylate networks

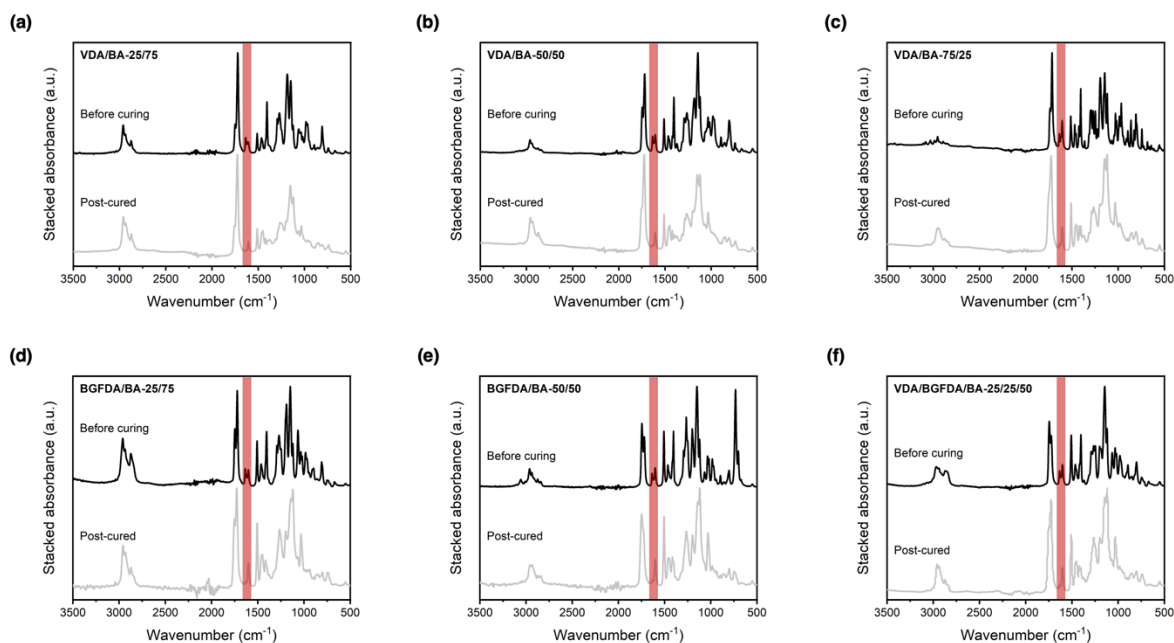

**Fig. S8** Stacked ATR-FTIR spectra of acrylate networks before and after thermal post-curing. The conversion was probed quantitatively by the disappearance of the acrylate carbon double bond stretching band at ~1635 cm<sup>-1</sup> (highlighted in red) with an internal reference of carbonyl double bond stretching band at ~1724 cm<sup>-1</sup> (128 scans, resolution 4 cm<sup>-1</sup>).

## Thermogravimetric analysis (TGA) results of acrylate networks

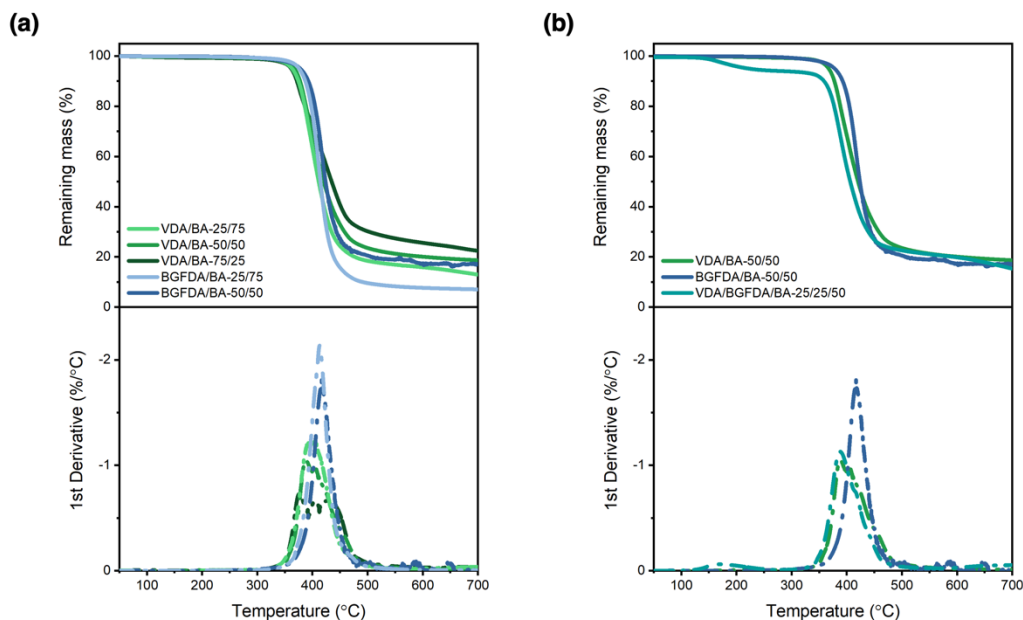

**Fig. S9** Thermogravimetric analysis traces and respective first-derivative curves of acrylate networks for (a) varying diacrylate content and (b) varying diacrylates (10 °C/min, N<sub>2</sub>).

**Table S1**  $T_{d,5\%}$  of acrylate networks.

| Sample                | $T_{d,5\%}$ (°C) |
|-----------------------|------------------|
| VDA/BA-25/75          | 363              |
| VDA/BA-50/50          | 367              |
| VDA/BA-75/25          | 361              |
| BGFDA/BA-25/75        | 376              |
| BGFDA/BA-50/50        | 378              |
| VDA/BGFDA/BA-25/25/50 | 222              |

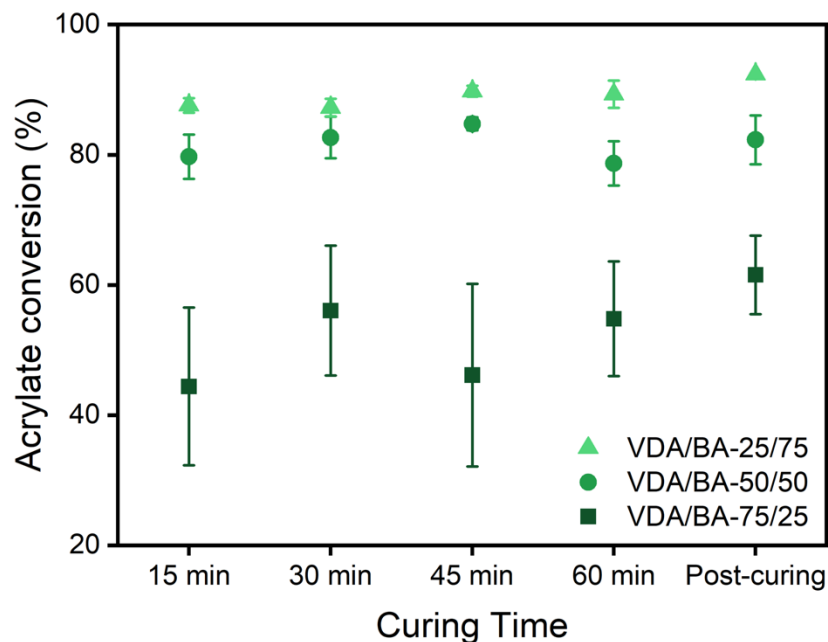

**Fig. S10** Conversion profile of VDA/BA networks at different curing times as an example of the evolution of network formation. Each data point represents the triplicated result using samples from different batch.

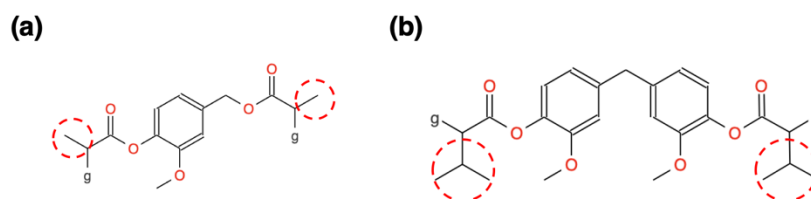

**Fig. S11** Structures used to predict  $T_g$ s of the homopolymer for (a) VDA and (b) BGFDA *via* Polymer Genome. ‘g’ represents the bond with repeated units, and side groups marked with red dashed circle denote the structure added manually to mimic crosslinked structure. The predicted  $T_g$  for VDA homopolymer is 194 °C and BGFDA homopolymer is 222 °C.

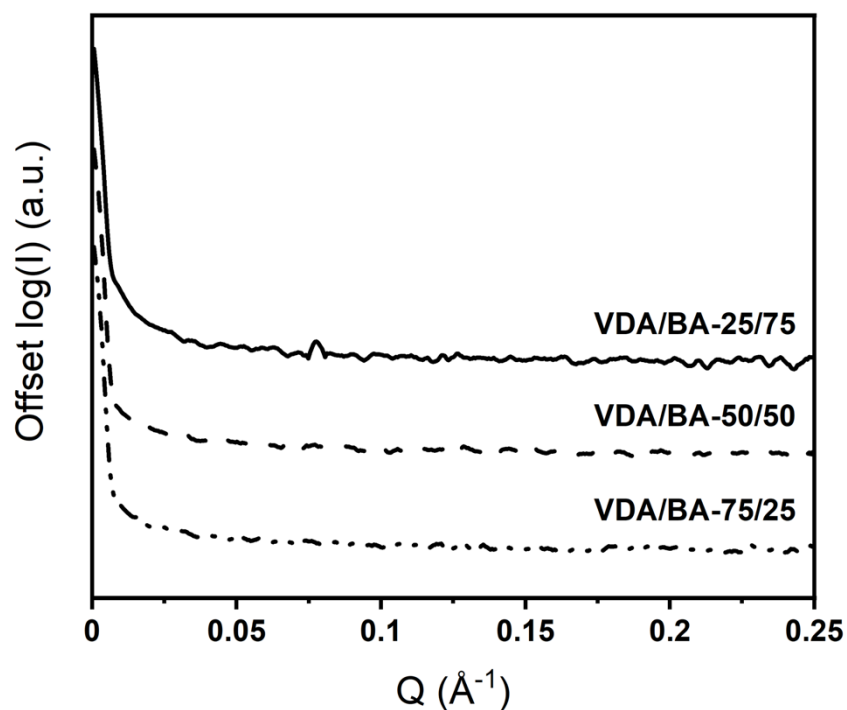

**Fig. S12** Small-angle X-ray scattering spectra for VDA/BA networks. Curves are based on absolute scale and shifted vertically for clarity (sample-to-detector distance: 1200 mm).

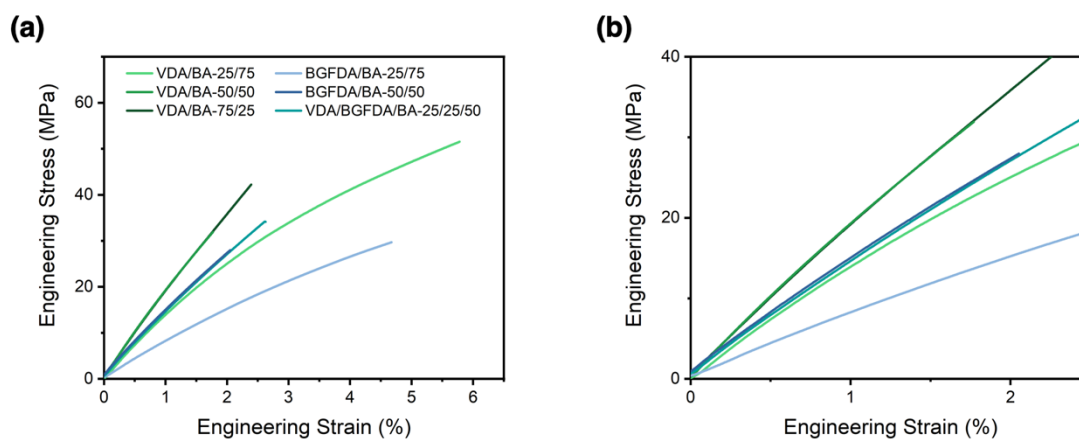

**Fig. S13** Uniaxial tensile curves of acrylate networks for (a) full scale and (b) scale in the low strain region.

**Table S2** Uniaxial tensile properties of acrylate networks

|                           | $E_t$ (GPa)   | $\varepsilon_B$ (%) | $\sigma_M$ (MPa) | Toughness (MJ m <sup>-3</sup> ) |
|---------------------------|---------------|---------------------|------------------|---------------------------------|
| VDA/BA-25/75              | $1.3 \pm 0.1$ | $4.3 \pm 1.6$       | $40.6 \pm 6.3$   | $1.1 \pm 0.5$                   |
| VDA/BA-50/50              | $2.0 \pm 0.4$ | $1.6 \pm 0.3$       | $28.8 \pm 4.0$   | $0.3 \pm 0.1$                   |
| VDA/BA-75/25              | $2.0 \pm 0.8$ | $1.9 \pm 0.4$       | $32.6 \pm 5.8$   | $0.3 \pm 0.1$                   |
| BGFDA/BA-25/75            | $0.8 \pm 0.2$ | $4.4 \pm 0.2$       | $28.6 \pm 1.2$   | $0.7 \pm 0.1$                   |
| BGFDA/BA-50/50            | $1.5 \pm 0.1$ | $1.8 \pm 0.3$       | $25.4 \pm 1.5$   | $0.3 \pm 0.1$                   |
| VDA/BGFDA/BA-<br>25/25/50 | $1.4 \pm 0.1$ | $2.3 \pm 0.3$       | $30.7 \pm 3.3$   | $0.4 \pm 0.1$                   |
